# Supplementary figures and images for: Genomic Analysis of Romanian Lycium Genotypes: Exploring BODYGUARD Genes for Stress Resistance Breeding
Source: MDPI journal article supplement (doi:10.3390/ijms25042130), 2024-02-09

Chromosome

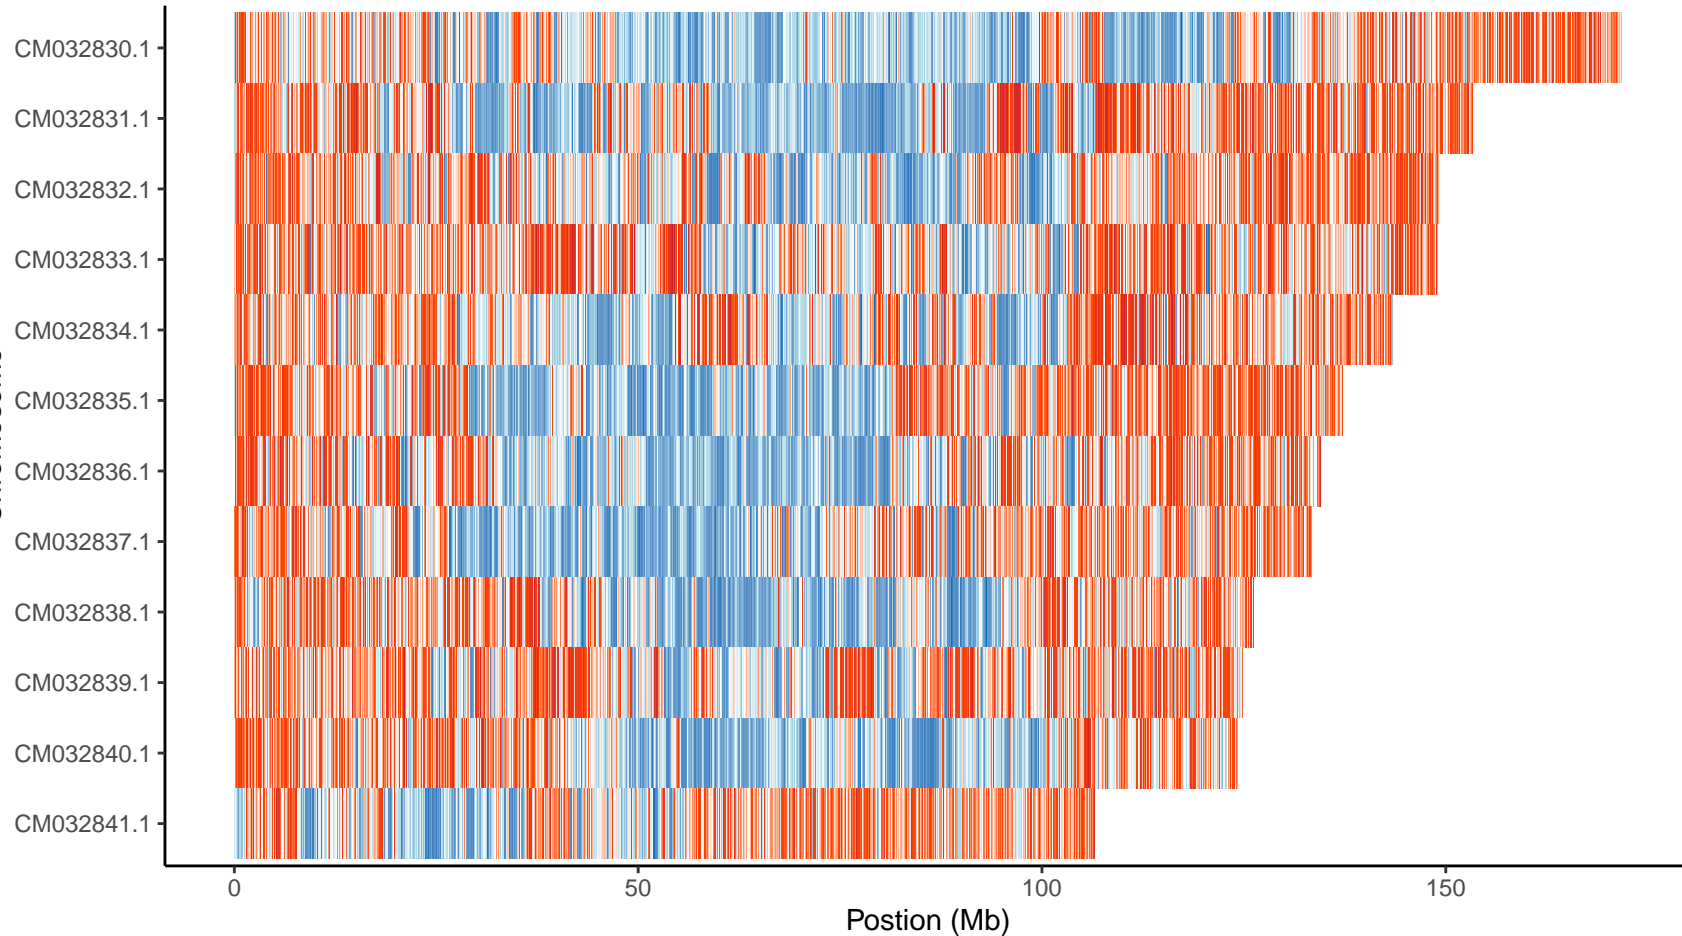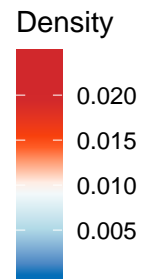

Chromosome

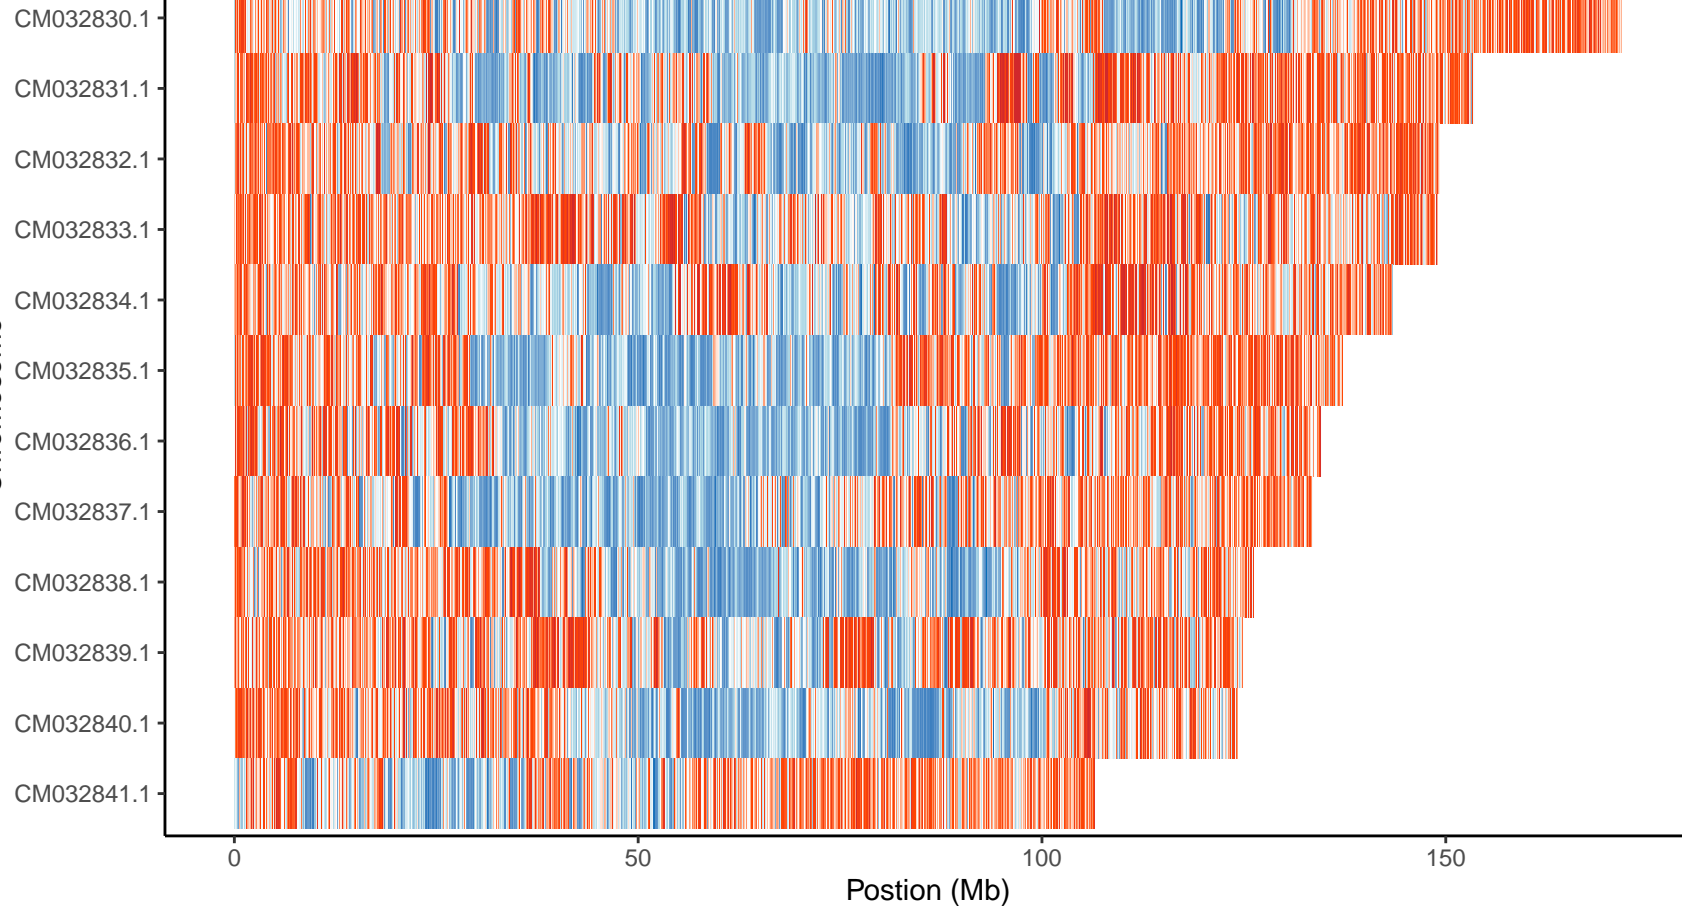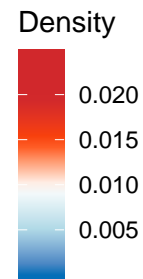

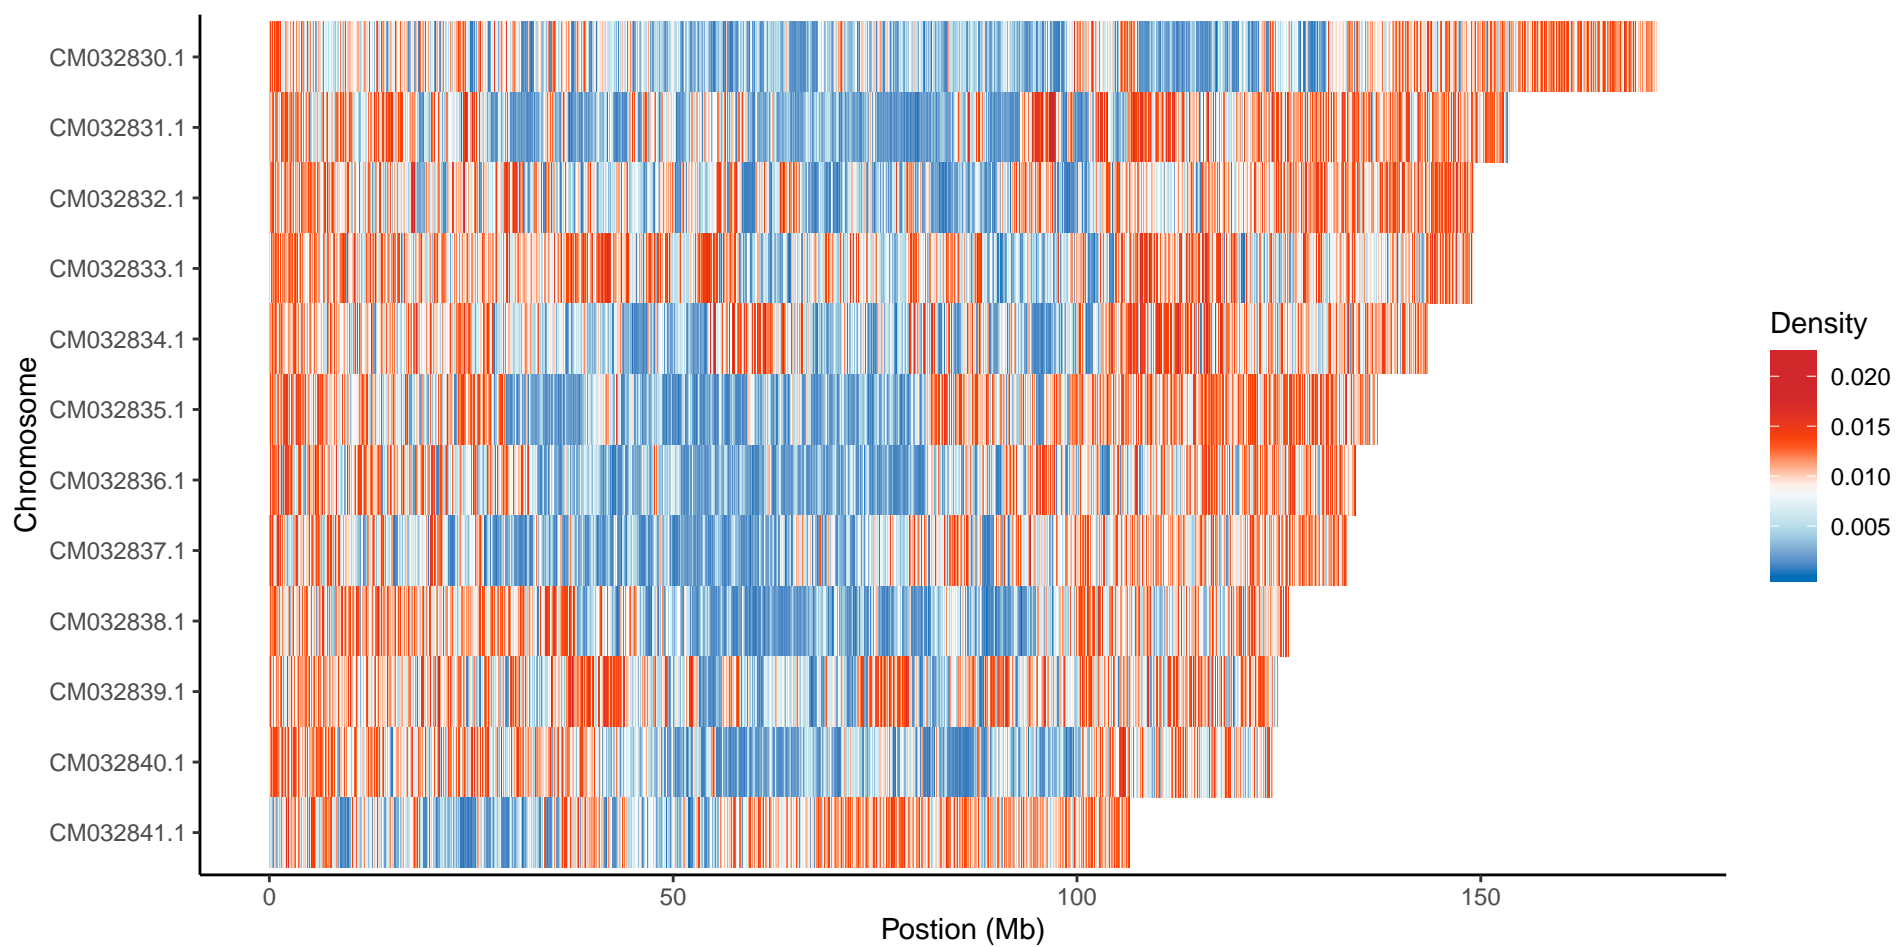

Chromosome

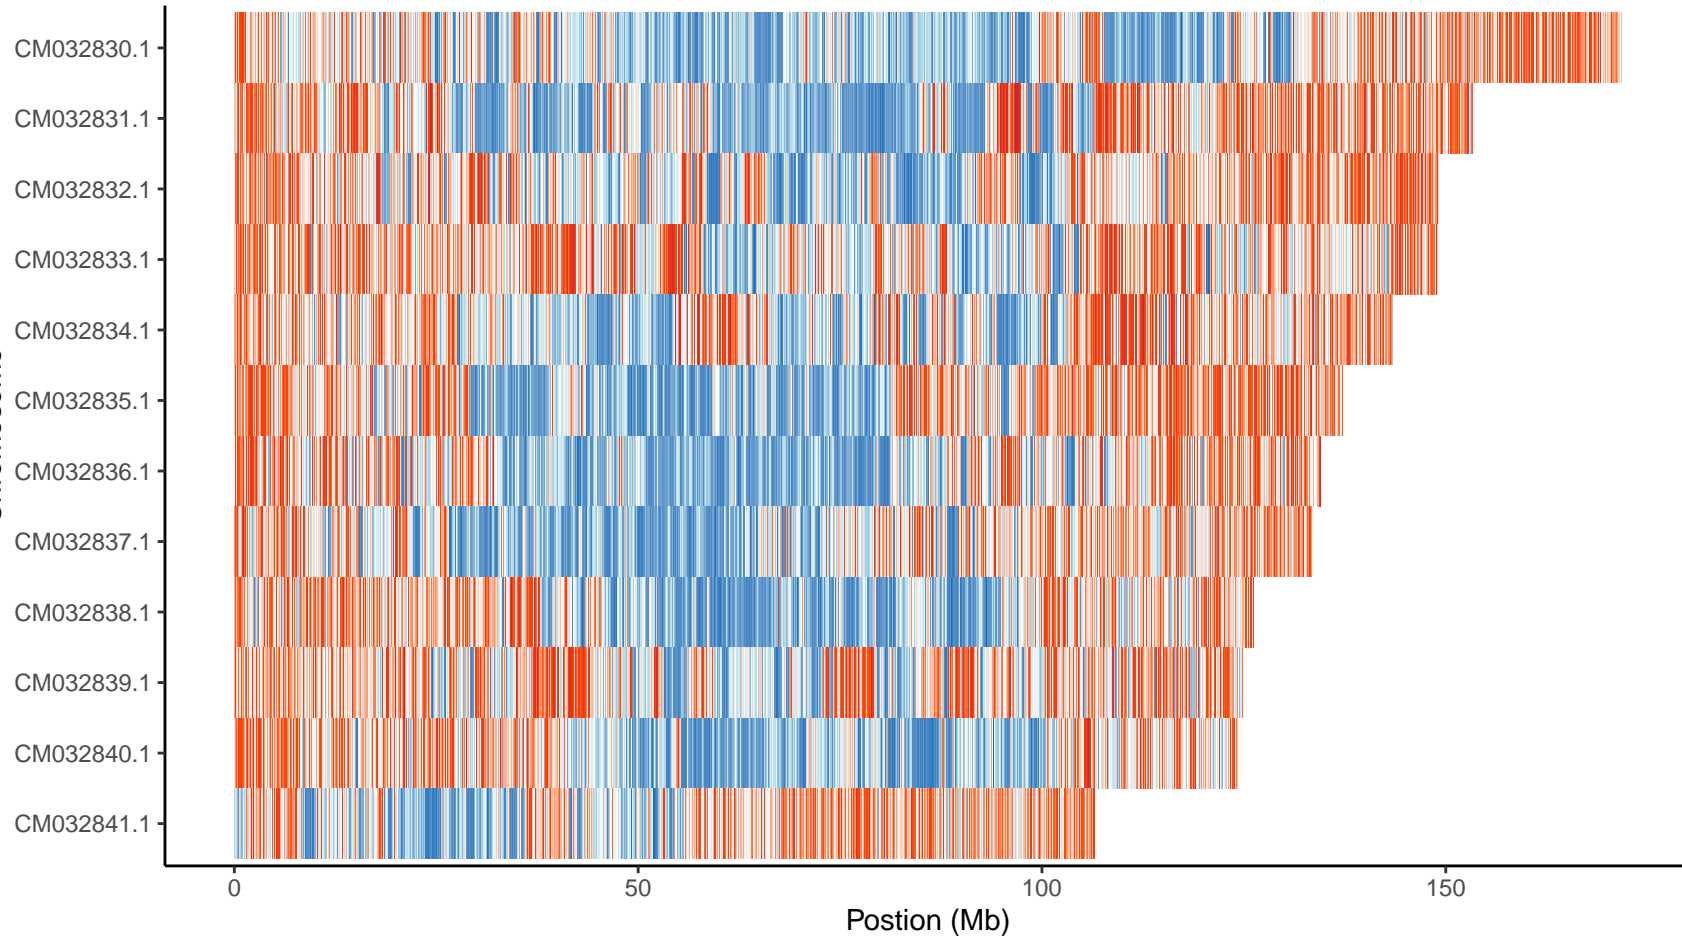

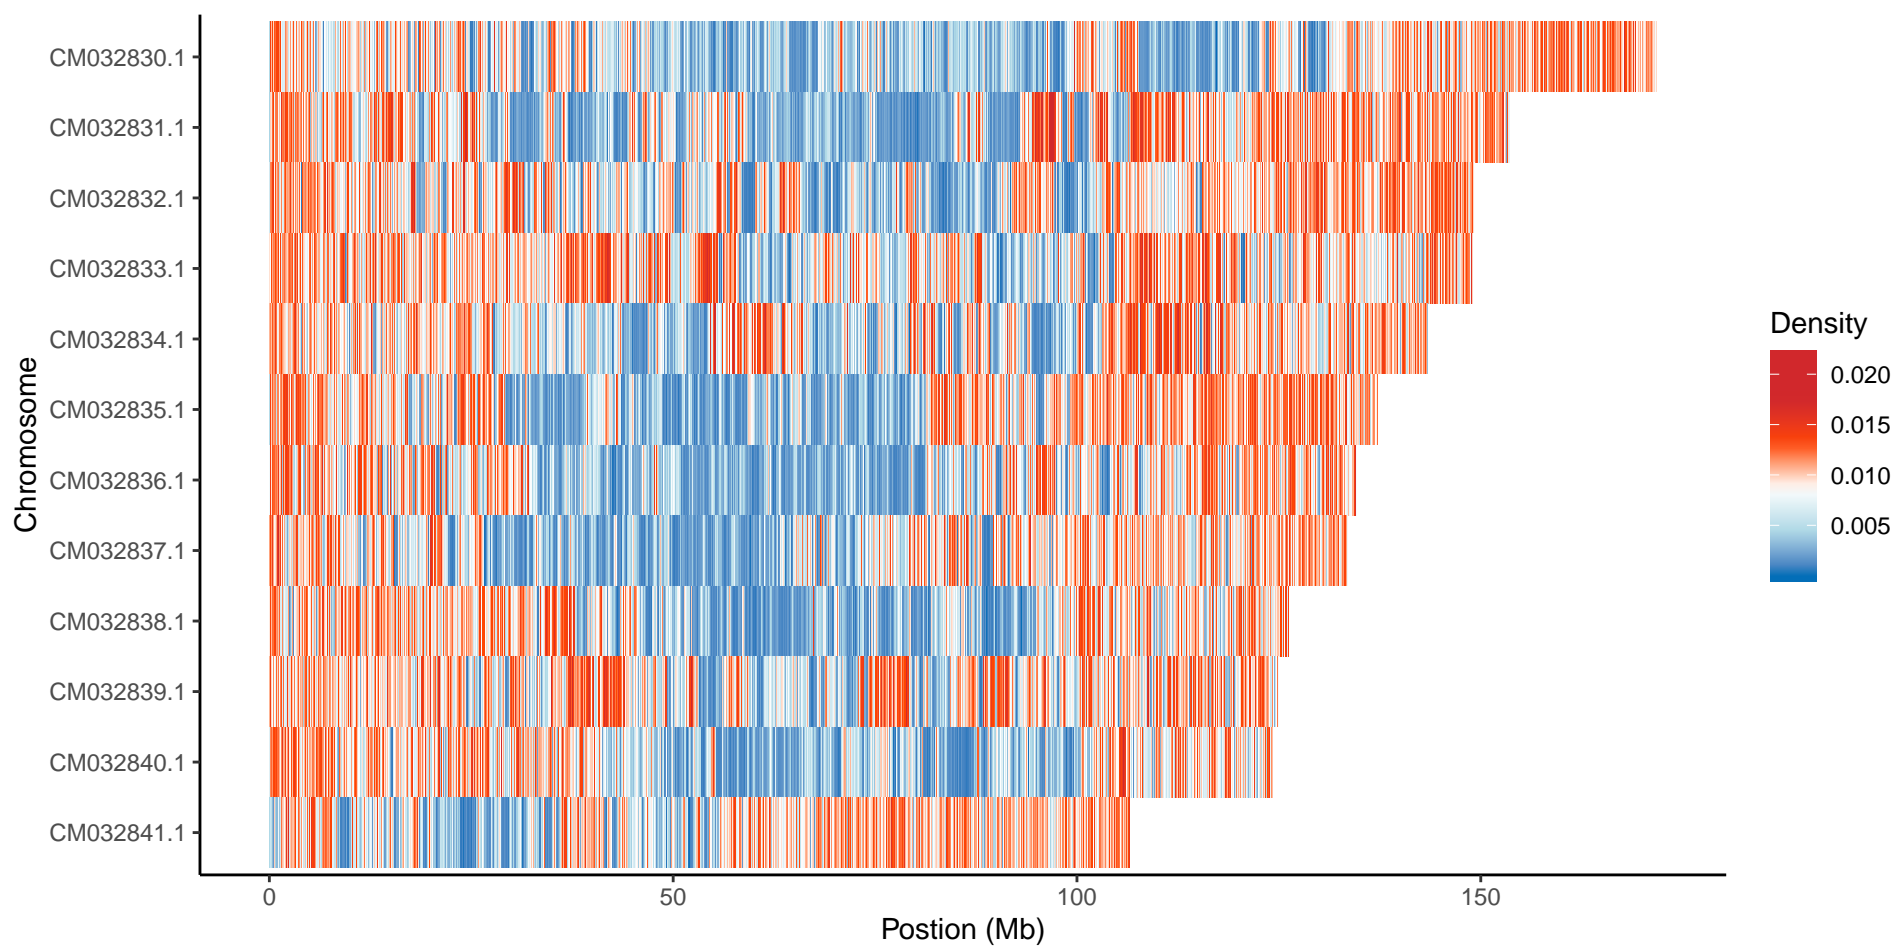

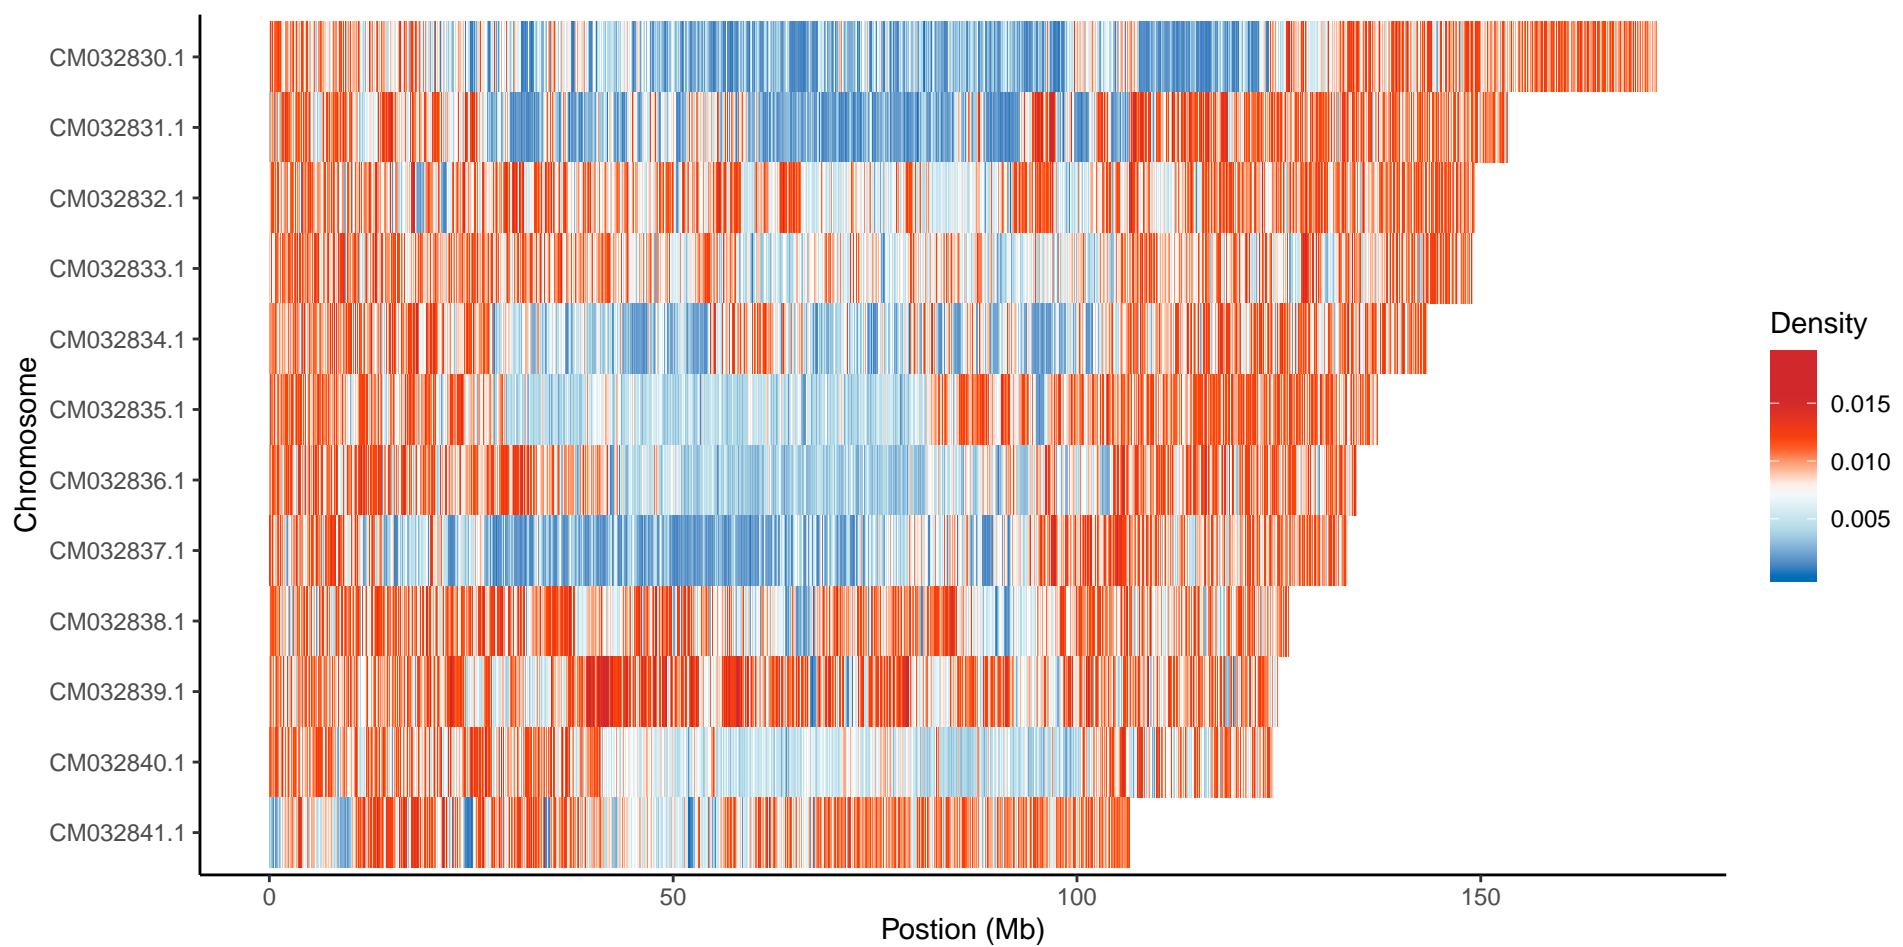

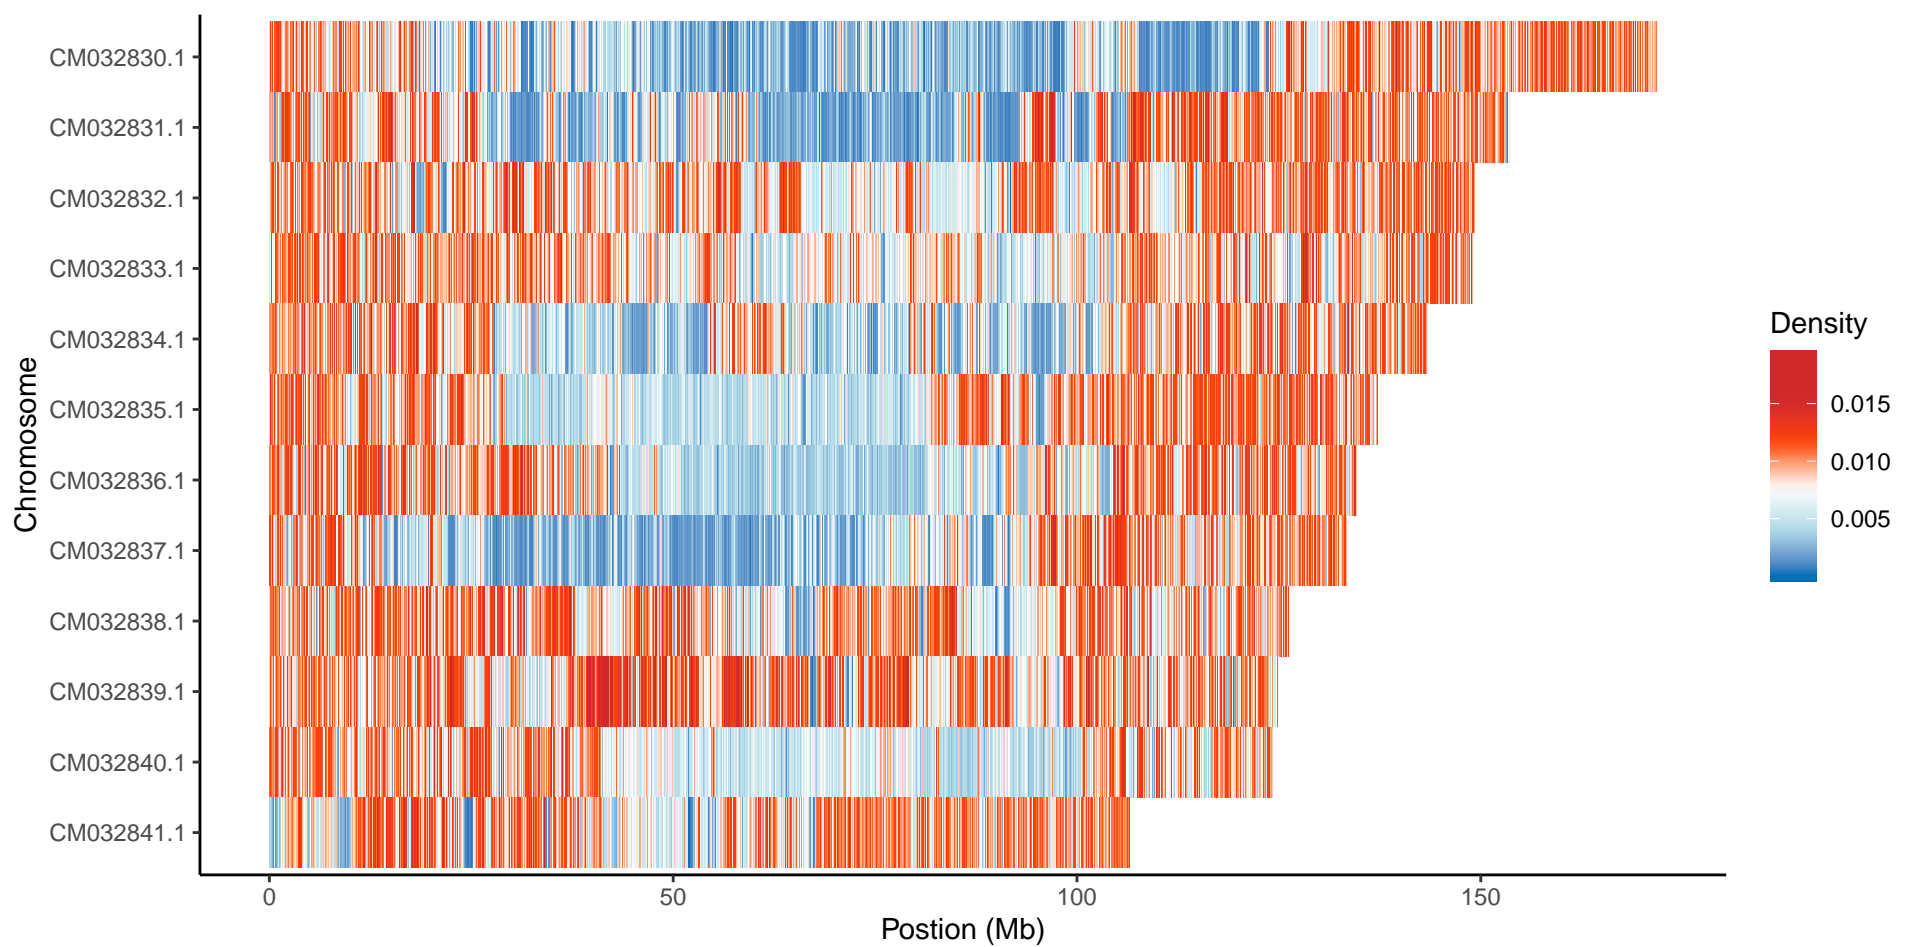

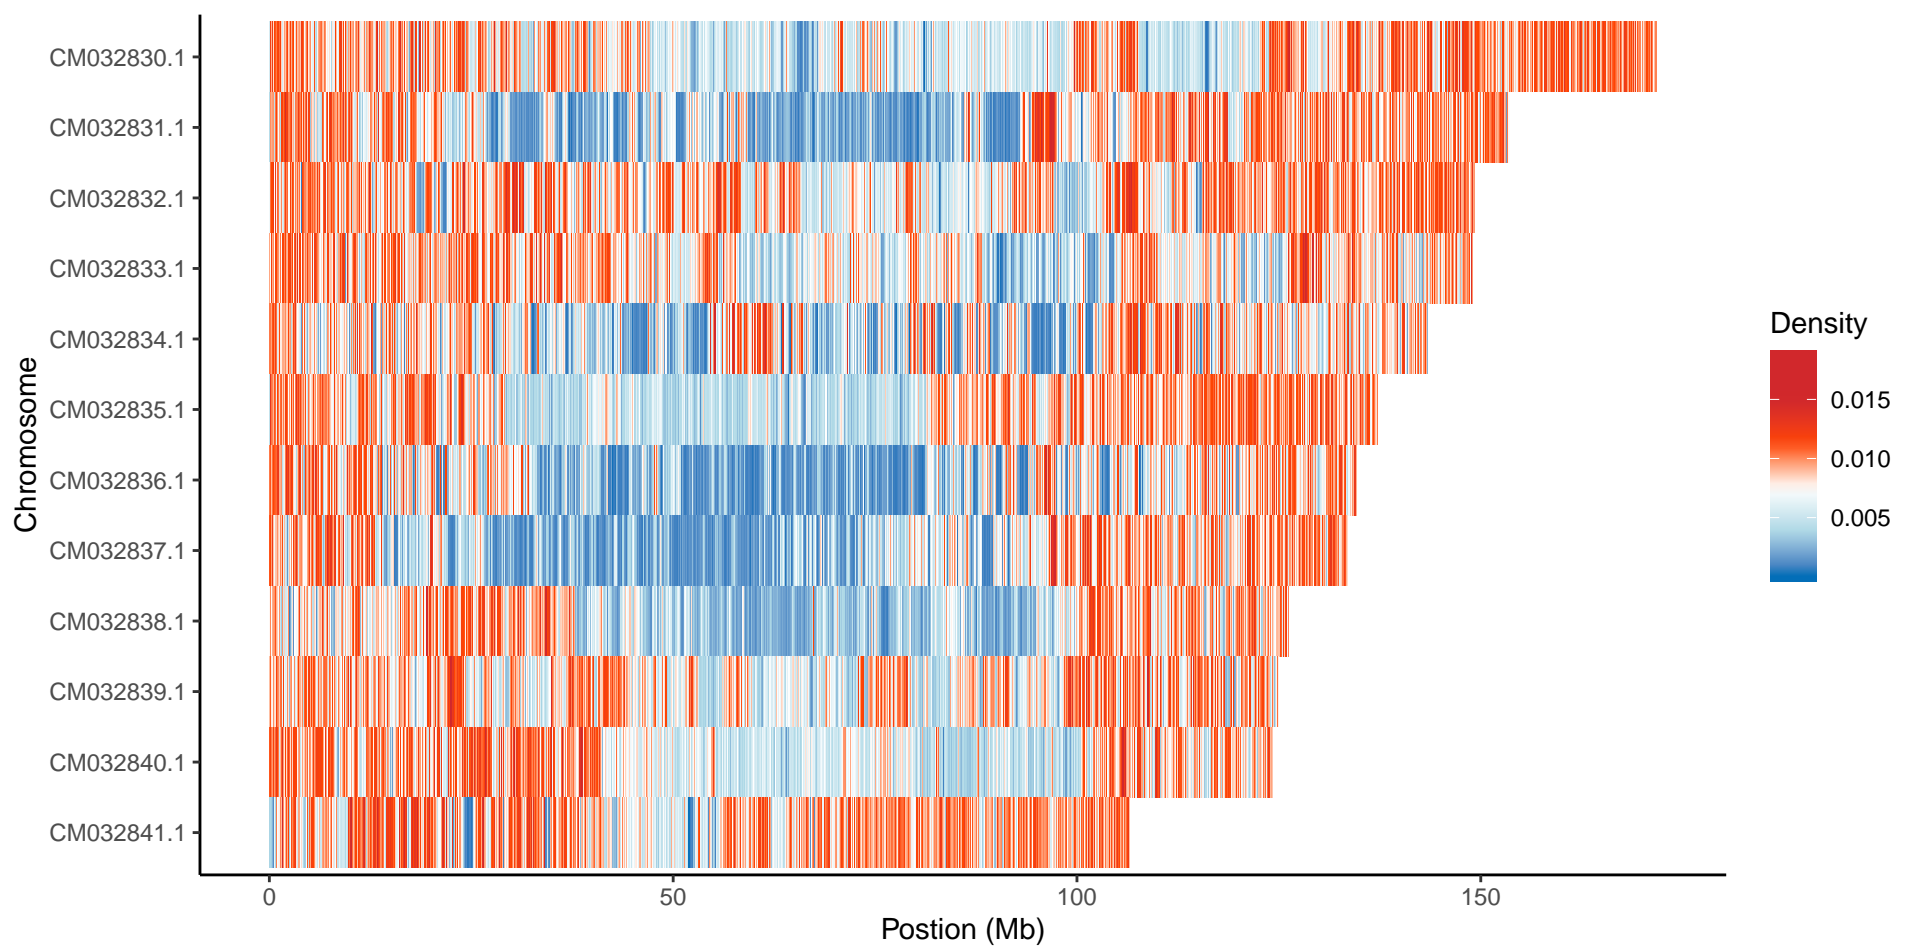



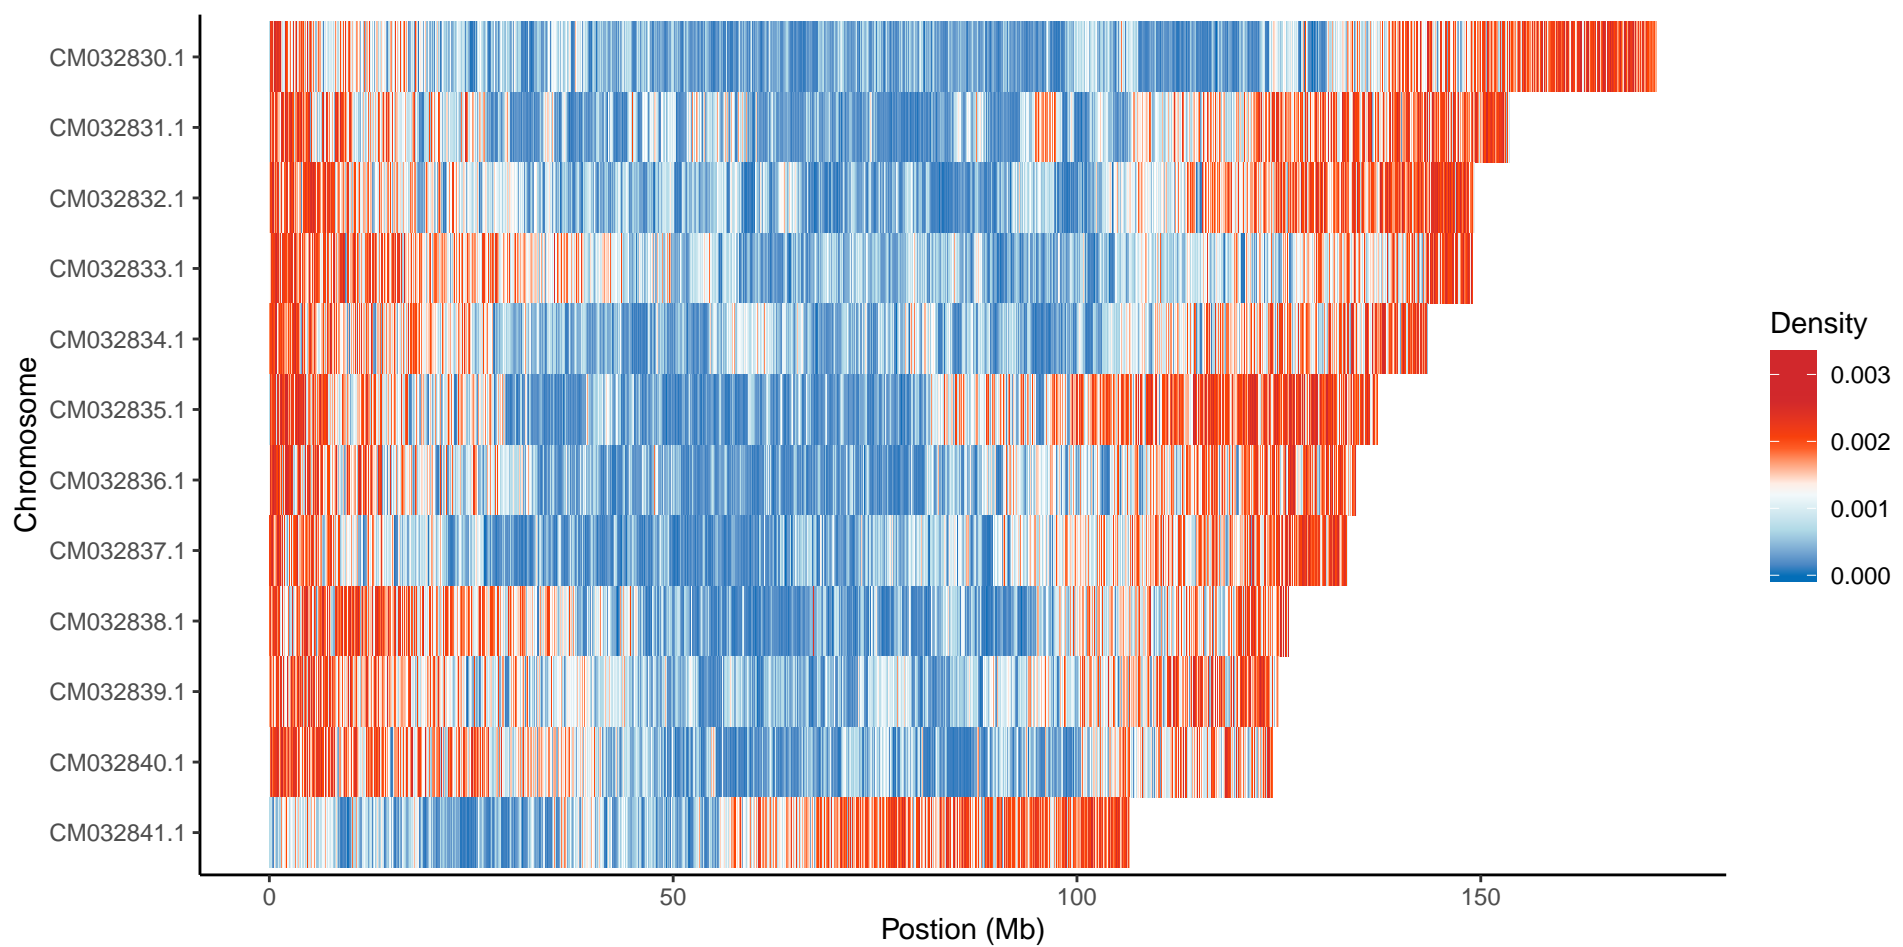

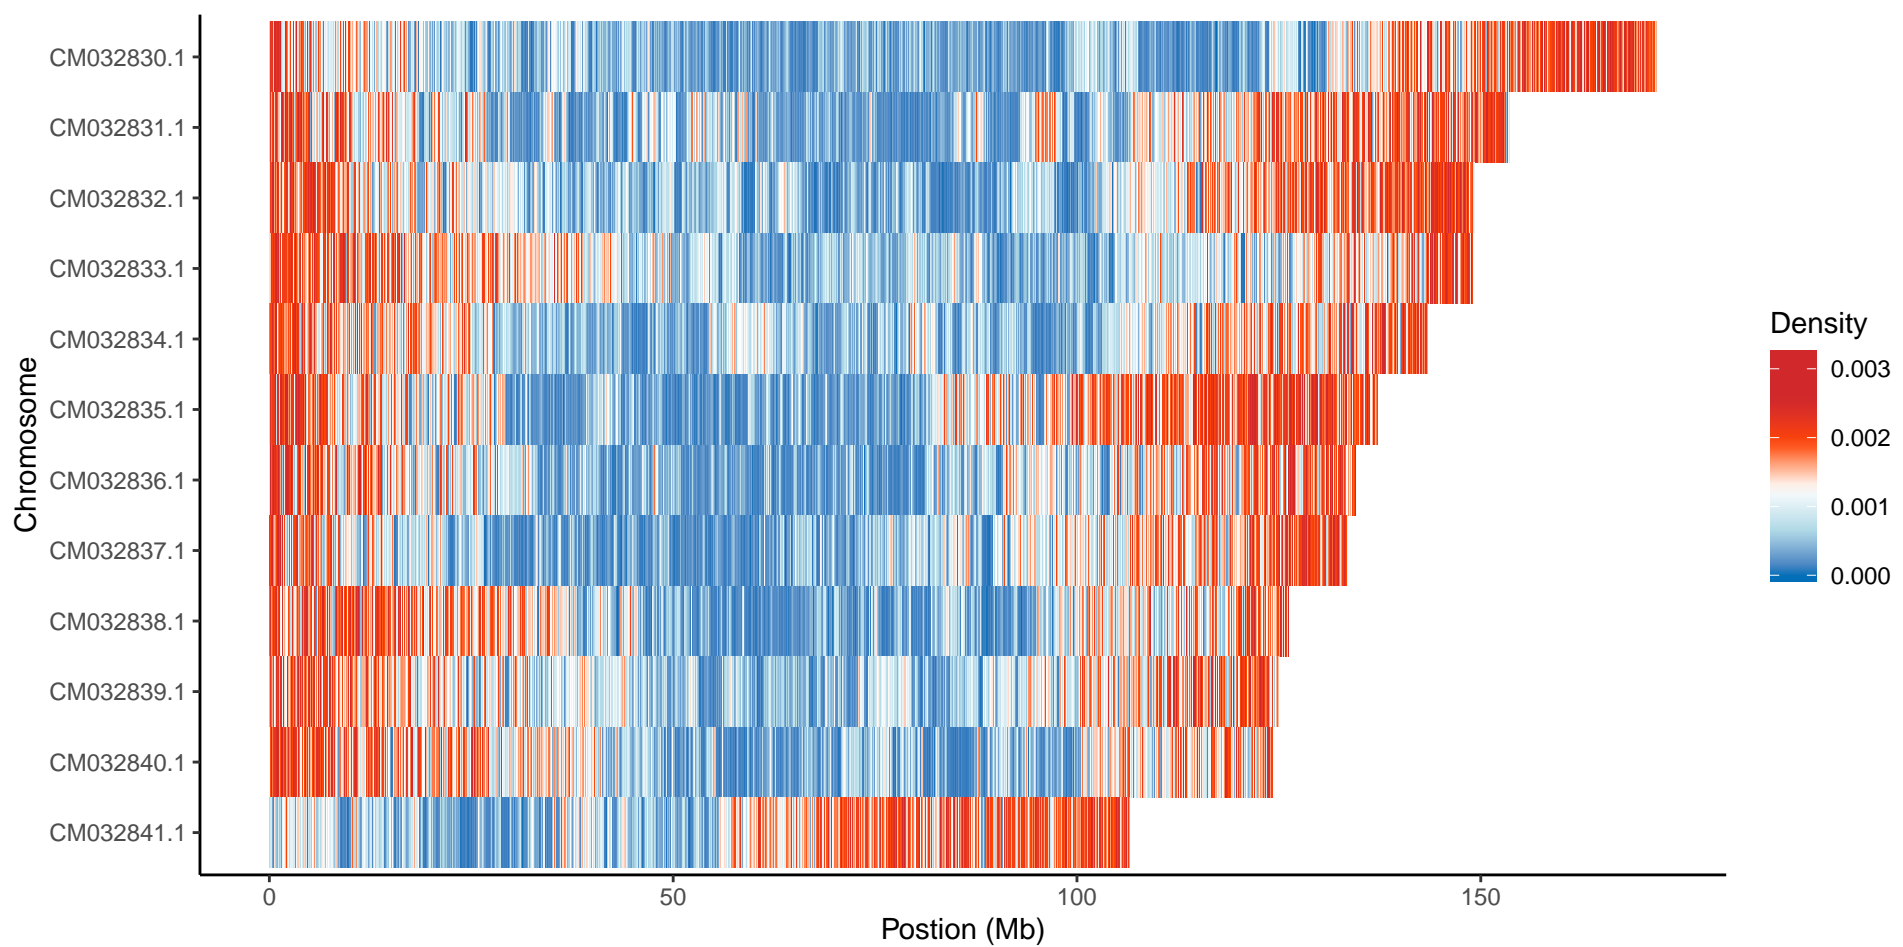

Chromosome

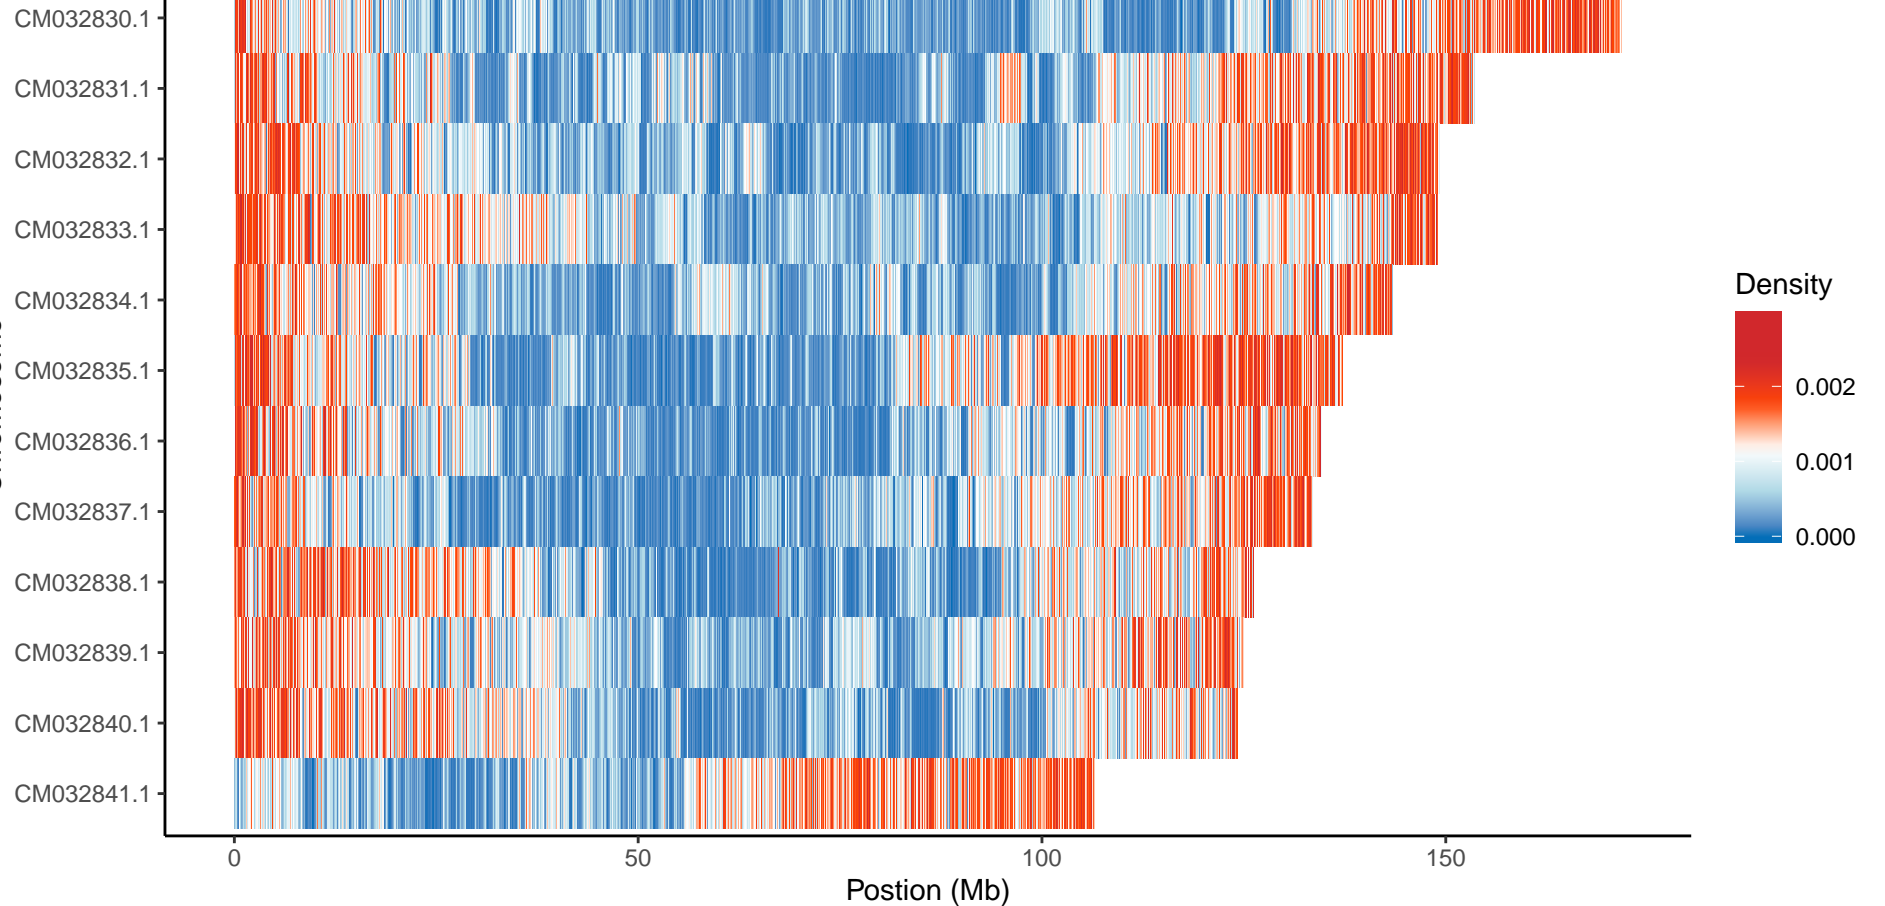

Chromosome

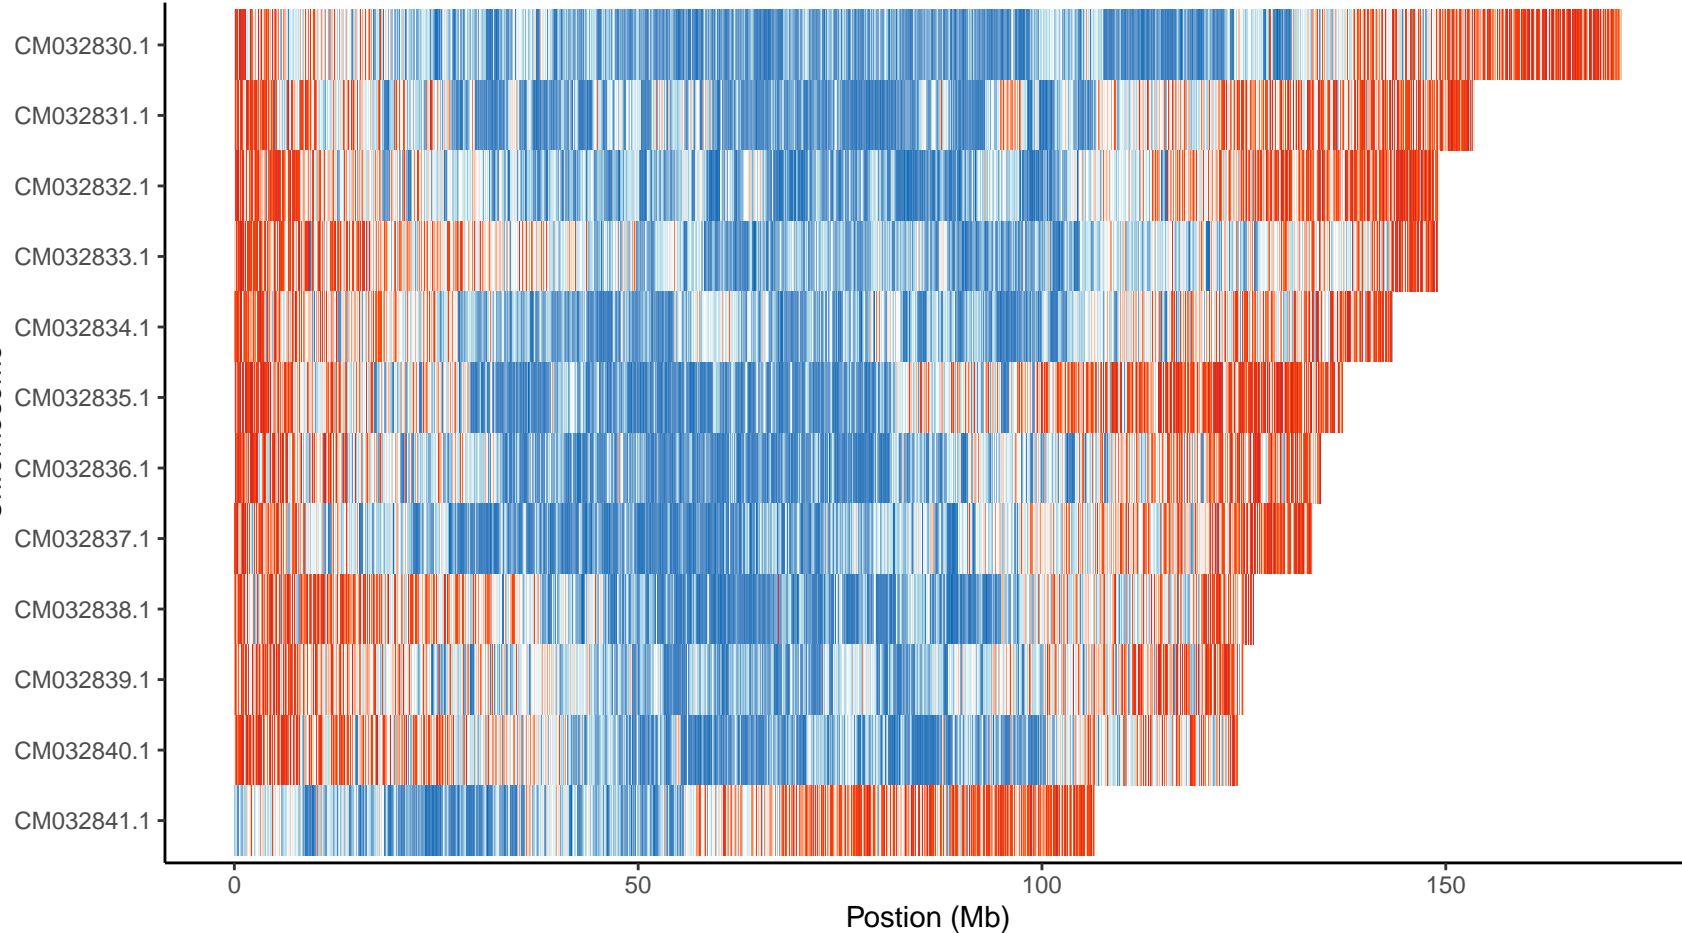

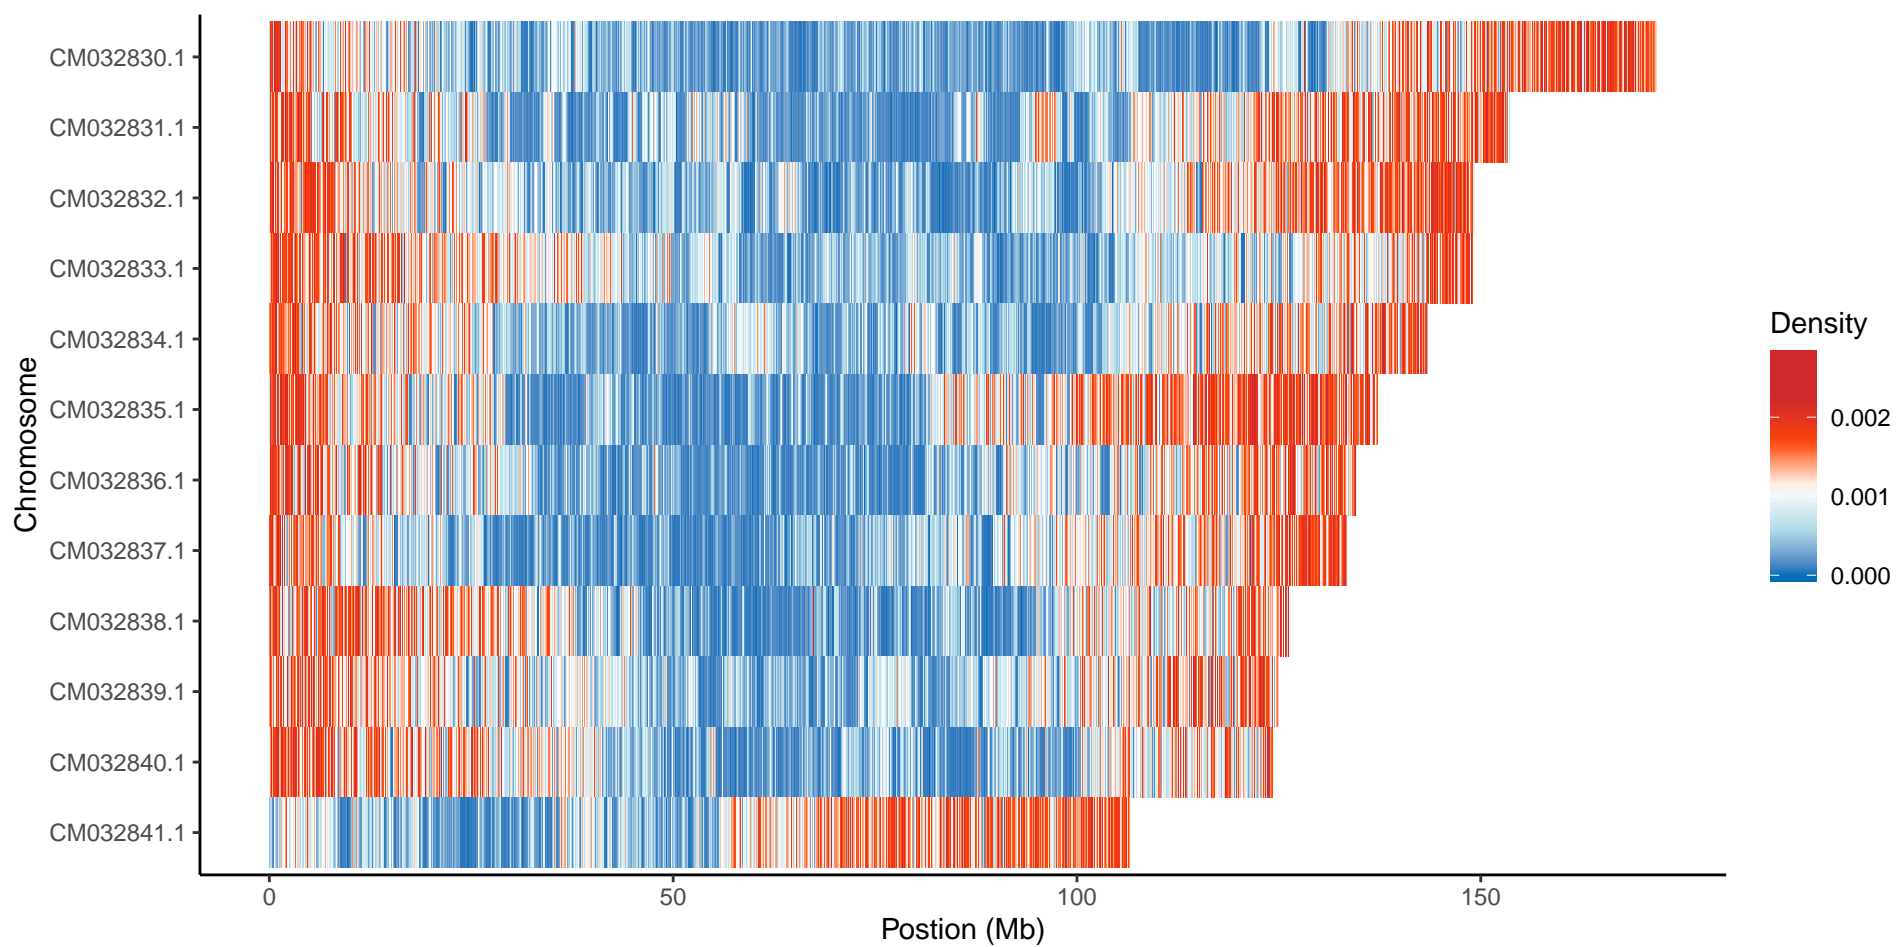

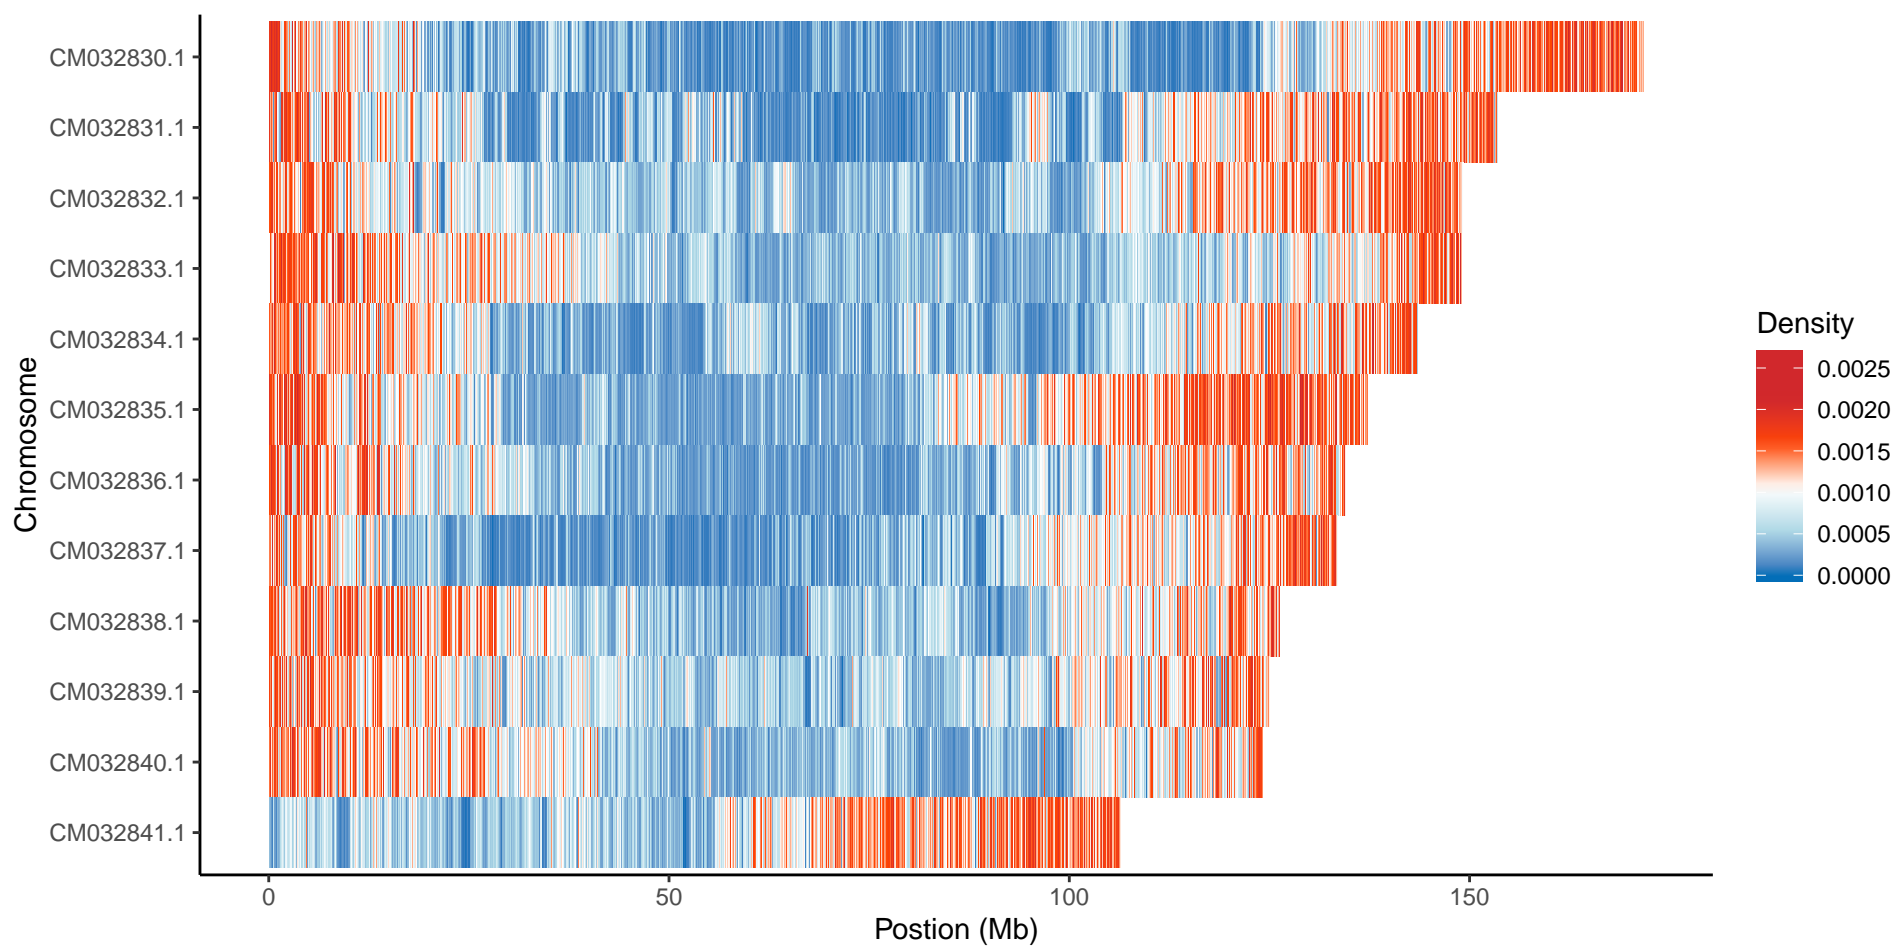

Chromosome

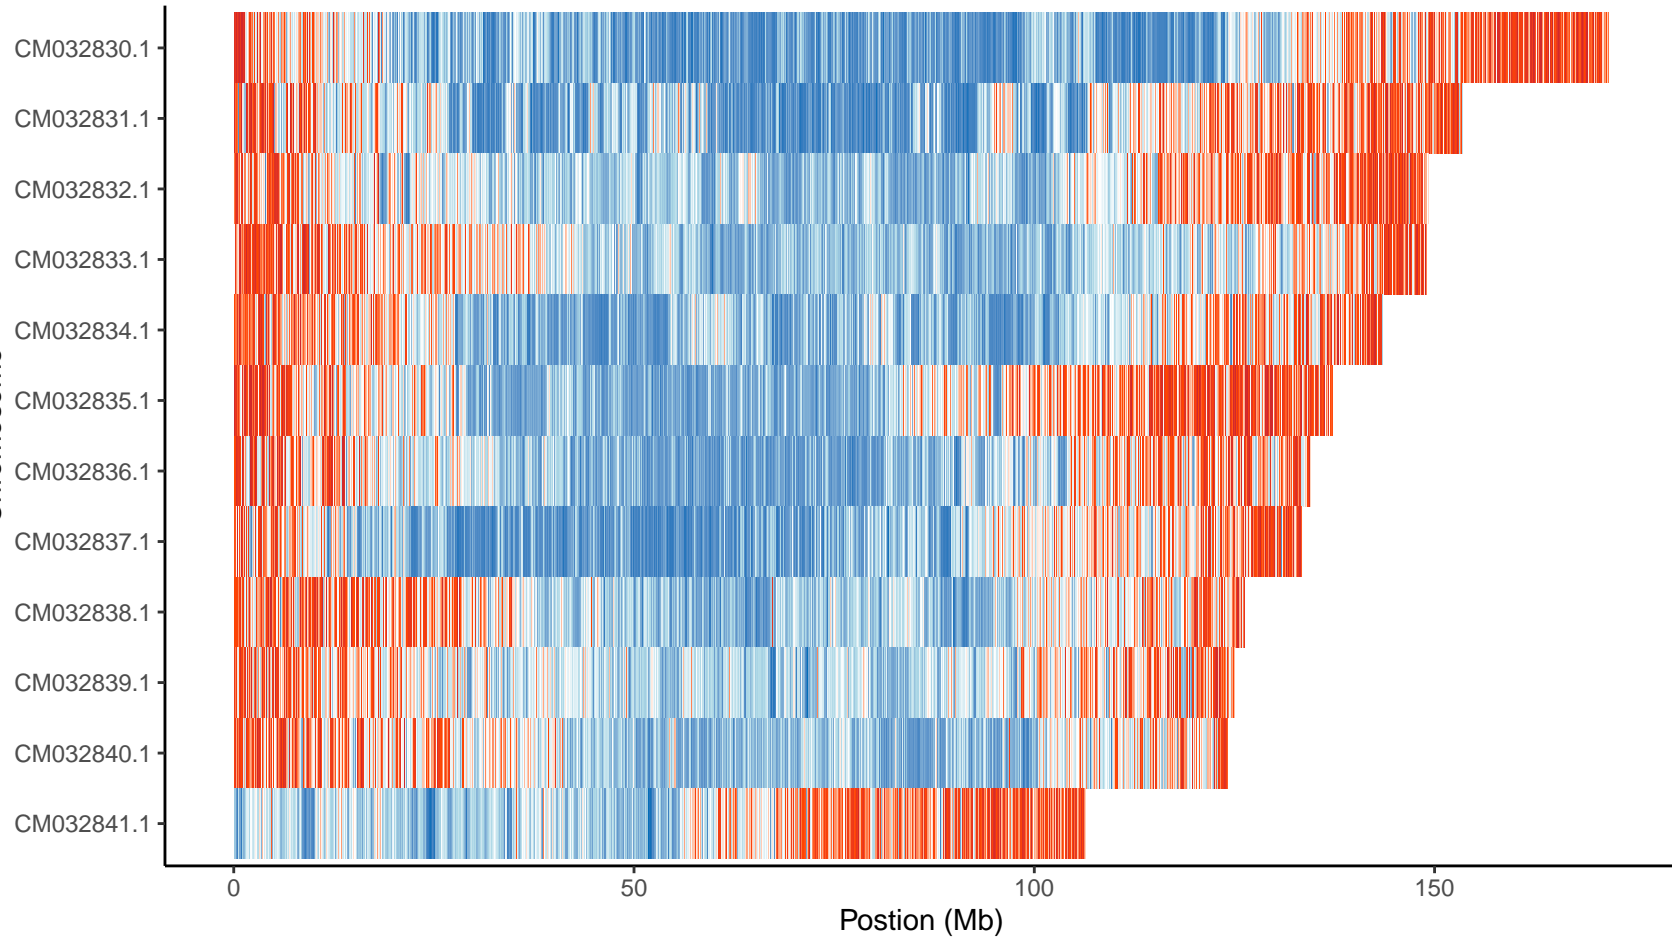

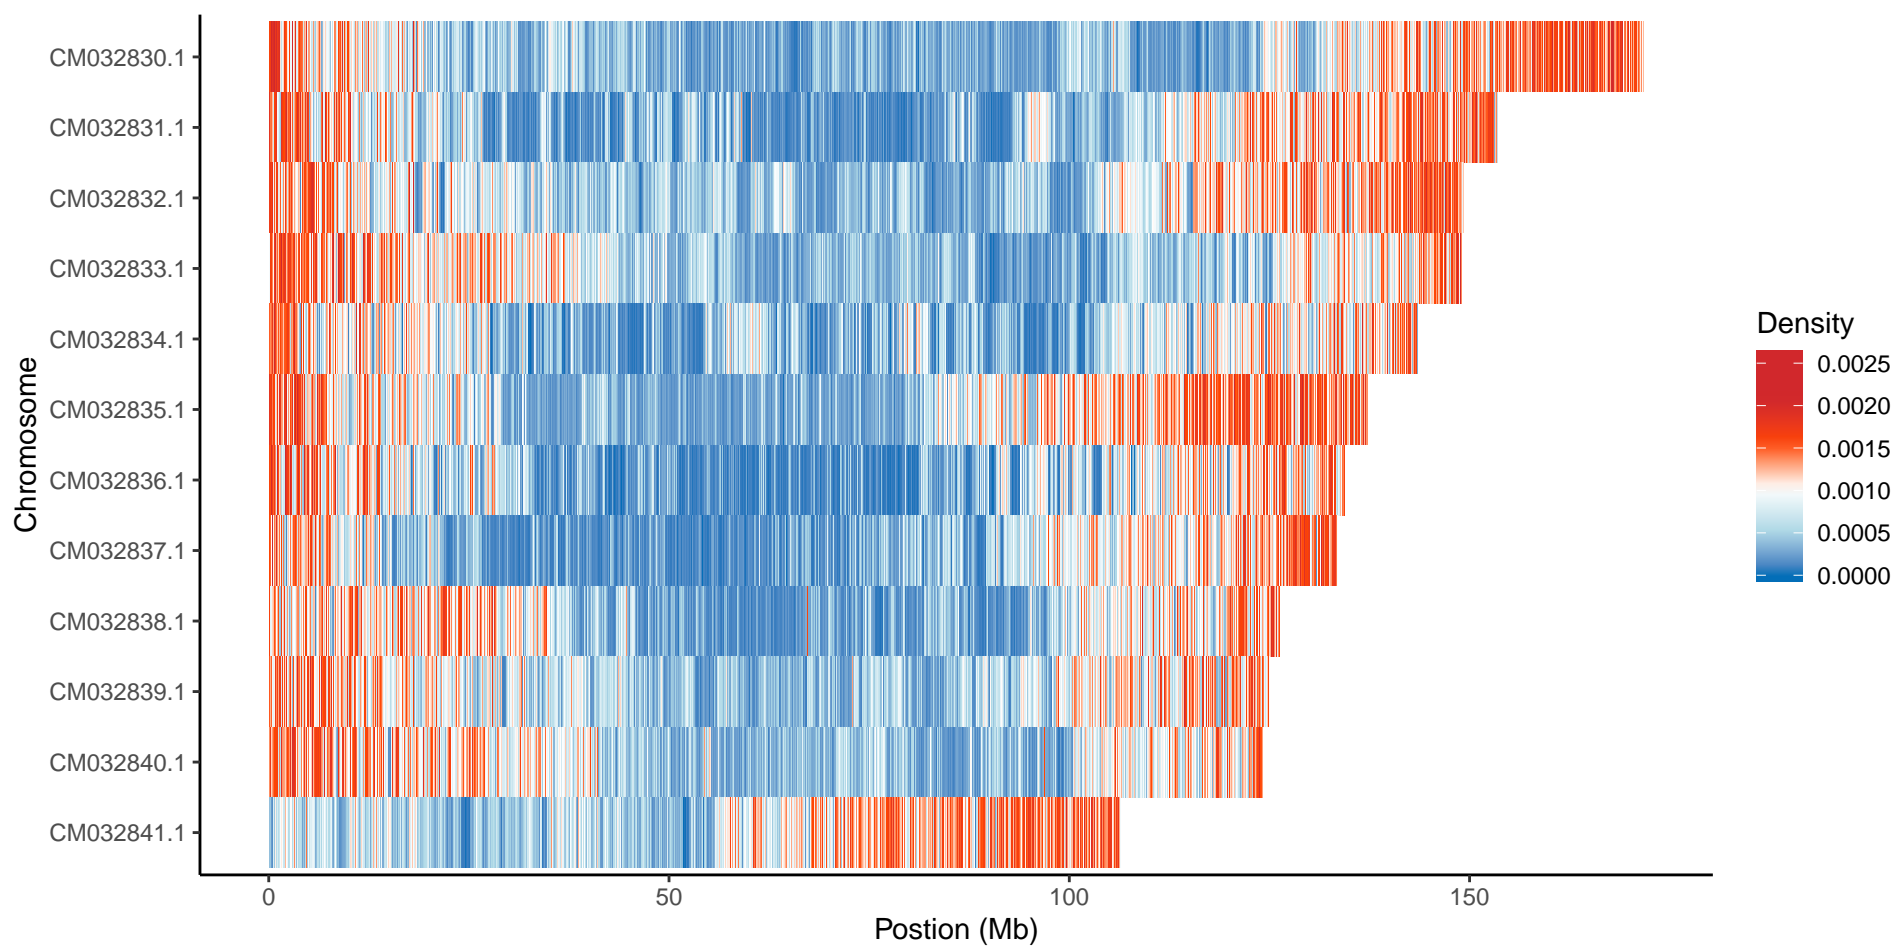

Supplement: s1 [file s1]
